# Supplementary material for: Deciphering Microbial Communities and Distinct Metabolic Pathways in the Tangyin Hydrothermal Fields of Okinawa Trough through Metagenomic and Genomic Analyses
Source: MDPI journal article supplement (doi:10.3390/microorganisms12030517), 2024-03-04
Supplement: s1 [file s1]

## Supplementary Materia

### Supplementary Tables

**Table S1.** Quality score and GTDB taxonomy of 34 MAGs retrieved from the Tangyin hydrothermal vent and 17 reference genomes.

| Genome | Completeness | Contamination | Taxonomy                                                                                                                      |
|--------|--------------|---------------|-------------------------------------------------------------------------------------------------------------------------------|
| MAG16  | 94.20529801  | 0.220750552   | d__Bacteria; p__Proteobacteria; c__Gammaproteobacteria; o__PS1; f__Thioglobaceae; g__s__                                      |
| MAG29  | 89.73160796  | 2.803738318   | d__Bacteria; p__Thermoproteota; c__Bathyarchaea; o__TCS64; f__TCS64; g__GCA-2726865; s__                                      |
| MAG19  | 88.85304659  | 1.612903226   | d__Bacteria; p__Desulfobacterota; c__Desulfobacteria; o__Desulfobacterales; f__SURF-7; g__s__                                 |
| MAG32  | 87.06896552  | 3.761755486   | d__Bacteria; p__Chloroflexota; c__Anaerolineae; o__Anaerolineales; f__UBA11858; g__UBA11858; s__                              |
| MAG4   | 83.82838284  | 0             | d__Bacteria; p__Chloroflexota; c__Dehalococcoidia; o__SZUA-161; f__SZUA-161; g__s__                                           |
| MAG23  | 81.25448029  | 0.896057348   | d__Bacteria; p__Desulfobacterota; c__Desulfobacteria; o__Desulfatiglandales; f__s__g__s__                                     |
| MAG15  | 81.17913832  | 1.636904762   | d__Bacteria; p__Desulfobacterota; c__Desulfobulbia; o__Desulfobulbales; f__BM004; g__BM004; s__                               |
| MAG12  | 78.48358357  | 2.248941319   | d__Bacteria; p__Proteobacteria; c__Gammaproteobacteria; o__Thiohalobacterales; f__DSM-19610; g__Thiogranum; s__               |
| MAG6   | 76.79723502  | 1.290322581   | d__Bacteria; p__Desulfobacterota; c__Desulfobacteria; o__Desulfobacterales; f__SURF-7; g__s__                                 |
| MAG24  | 73.87096774  | 1.612903226   | d__Bacteria; p__Desulfobacterota; c__Desulfobacteria; o__Desulfobacterales; f__BuS5; g__s__                                   |
| MAG30  | 73.34833527  | 0.571041425   | d__Bacteria; p__Proteobacteria; c__Gammaproteobacteria; o__Chromatiales; f__Sedimenticolaceae; g__s__                         |
| MAG9   | 70.90919701  | 1.680672269   | d__Bacteria; p__Desulfobacterota; c__s__o__f__g__s__                                                                          |
| MAG13  | 67.81003584  | 1.095750128   | d__Bacteria; p__Desulfobacterota; c__Desulfobacteria; o__C00003060; f__C00003060; g__s__                                      |
| MAG18  | 66.65566557  | 2.090209021   | d__Bacteria; p__Chloroflexota; c__Dehalococcoidia; o__f__g__s__                                                               |
| MAG10  | 66.25759459  | 1.232394366   | d__Bacteria; p__Proteobacteria; c__Gammaproteobacteria; o__UBA4486; f__UBA4486; g__SMWN01; s__                                |
| MAG27  | 66.06024289  | 1.681048258   | d__Bacteria; p__Bacteroidota; c__Bacteroidia; o__Flavobacteriales; f__Flavobacteriaceae; g__QNYL01; s__                       |
| MAG17  | 65.86844528  | 2.697302697   | d__Bacteria; p__Fermentibacterota; c__Fermentibacteria; o__Fermentibacterales; f__Fermentibacteraceae; g__Aegiribacteria; s__ |
| MAG33  | 65.37137114  | 4.651080827   | d__Bacteria; p__Bacteroidota; c__Bacteroidia; o__Cytophagales; f__Cyclobacteriaceae; g__s__                                   |
| MAG21  | 63.31738437  | 0             | d__Bacteria; p__Bacteroidota; c__Bacteroidia; o__Flavobacteriales; f__Flavobacteriaceae; g__QNYL01; s__                       |
| MAG22  | 63.05948953  | 1.648351648   | d__Bacteria; p__Eisenbacteria; c__s__o__f__g__s__                                                                             |
| MAG31  | 62.53779289  | 1.785714286   | d__Bacteria; p__Desulfobacterota; c__Desulfobulbia; o__Desulfobulbales; f__Desulfobulbaceae; g__Electrothrix; s__             |
| MAG8   | 61.57706093  | 0             | d__Bacteria; p__Desulfobacterota; c__Desulfobacteria; o__Desulfobacterales; f__UBA5852; g__s__                                |
| MAG25  | 60.47654596  | 1.32387462    | d__Bacteria; p__Proteobacteria; c__Gammaproteobacteria; o__Woeseiales; f__Woeseiaceae; g__UBA1847; s__                        |
| MAG14  | 60.00921659  | 0.921658986   | d__Bacteria; p__Desulfobacterota; c__Desulfobacteria; o__Desulfobacterales; f__BuS5; g__UBA11574; s__                         |
| MAG28  | 58.62068966  | 0             | d__Bacteria; p__Proteobacteria; c__Gammaproteobacteria; o__UBA10353; f__LS-SOB; g__s__                                        |
| MAG3   | 57.24471607  | 5.238878768   | d__Bacteria; p__Gemmatimonadota; c__Gemmatimonadetes; o__Gemmatimonadales; f__GWC2-71-9; g__s__                               |
| MAG1   | 55.85909418  | 2.803738318   | d__Bacteria; p__Thermoproteota; c__Bathyarchaea; o__TCS64; f__TCS64; g__RBG-16-57-9; s__                                      |
| MAG20  | 54.9489726   | 1.098901099   | d__Bacteria; p__Zixibacteria; c__MSB-5A5; o__f__g__s__                                                                        |
| MAG2   | 54.4488656   | 4.000603865   | d__Bacteria; p__Proteobacteria; c__Gammaproteobacteria; o__Xanthomonadales; f__SZUA-36; g__s__                                |
| MAG7   | 52.9109063   | 2.580645161   | d__Bacteria; p__Desulfobacterota; c__Desulfobacteria; o__Desulfobacterales; f__BuS5; g__S5133MH16; s__                        |
| MAG34  | 52.87114846  | 2.315592904   | d__Bacteria; p__Proteobacteria; c__Zetaproteobacteria; o__Mariprofundales; f__Mariprofundaceae; g__s__                        |
| MAG11  | 52.50332821  | 2.424475166   | d__Bacteria; p__Desulfobacterota; c__Desulfobacteria; o__Desulfobacterales; f__BuS5; g__s__                                   |
| MAG26  | 52.36303123  | 0.537634409   | d__Bacteria; p__Desulfobacterota; c__Desulfobacteria;                                                                         |

|           |             |      |                                                                |
|-----------|-------------|------|----------------------------------------------------------------|
|           |             |      | o Desulfobacterales; f SG8-13; g ; s                           |
|           |             |      | (Continued)                                                    |
| MAG5      | 51.96523054 | 0    | d_Bacteria; p_Desulfobacterota; c_Desulfobulbia;               |
| GCA_00030 | 100         | 0    | o_Desulfobulbales; f_Desulfobulbaceae; g_QNYF01; s__           |
| 7955.1    |             |      | d_Bacteria; p_Desulfobacterota; c_Desulfovibrionia;            |
| GCA_00179 | 94.96       | 1.68 | o_Desulfovibrionales; f_Desulfovibrionaceae;                   |
| 7445.1    |             |      | g_Solidesulfobulbia; s_Solidesulfobulbia magneticus A          |
| GCA_00179 | 94.84       | 2.26 | d_Bacteria; p_Desulfobacterota E; c_Deferrimicrobia;           |
| 7465.1    |             |      | o_Deferrimicrobiales; f_Deferrimicrobiaceae;                   |
| GCA_00203 | 95.05       | 2.2  | g_Deferrimicrobium; s_Deferrimicrobium sp001797445             |
| 0045.1    |             |      | d_Bacteria; p_Desulfobacterota F; c_GWC2-55-46; o_GWC2-        |
| GCA_01472 | 96.15       | 1.28 | 55-46; f_GWC2-55-46; g_GWB2-55-19; s_GWB2-55-19                |
| 8175.1    |             |      | sp001797465                                                    |
| GCA_00589 | 92.66       | 1.1  | d_Bacteria; p_Fermentibacterota; c_Fermentibacteria;           |
| 3265.1    |             |      | o_Fermentibacterales; f_Fermentibacteraceae; g_Aegiribacteria; |
| GCA_00178 | 98.9        | 0    | s_Aegiribacteria sp002030045                                   |
| 0165.1    |             |      | d_Bacteria; p_Fermentibacterota; c_Fermentibacteria;           |
| GCA_01692 | 91.16       | 3.3  | o_Fermentibacterales; f_Fermentibacteraceae; g_WJMA01;         |
| 8395.1    |             |      | s_WJMA01 sp014728175                                           |
| GCA_01693 | 92.31       | 2.2  | d_Bacteria; p_Eisenbacteria; c_RBG-16-71-46; o_SZUA-252;       |
| GCA_00364 | 93.1        | 2.5  | f_SZUA-252; g_WS-7; s_WS-7 sp005893265                         |
| 1425.1    |             |      | d_Bacteria; p_Eisenbacteria; c_RBG-16-71-46; o_RBG-16-71-      |
| GCA_00359 | 91.21       | 1.1  | 46; f_RBG-16-71-46; g_RBG-16-71-46; s_RBG-16-71-46             |
| 9535.1    |             |      | sp001780165                                                    |
| GCA_00156 | 97.27       | 0    | d_Bacteria; p_Fermentibacterota; c_JAFGKV01;                   |
| 7485.1    |             |      | o_JAFGKV01; f_JAFGKV01; g_JAFGKV01; s_JAFGKV01                 |
| GCF_00052 | 97.58       | 0    | sp016928395                                                    |
| 6415.1    |             |      | d_Bacteria; p_Fermentibacterota; c_Fermentibacteria;           |
| GCF_00019 | 99.7        | 0    | o_Fermentibacterales; f_Fermentibacteraceae; g_Aegiribacteria; |
| 3795.1    |             |      | s_Aegiribacteria sp016936235                                   |
| GCA_00001 | 99.7        | 0.1  | d_Bacteria; p_Zixibacteria; c_MSB-5A5; o_GN15;                 |
| 6325.1    |             |      | f_PGXB01; g_PGXB01; s_PGXB01 sp003641425                       |
| GCA_00026 | 100         | 0.3  | d_Bacteria; p_AABM5-125-24; c_B3-LCP; o_B3-LCP; f_B3-          |
| GCA_00043 | 98.1        | 0.96 | LCP; g_SURF-9; s_SURF-9 sp003599535                            |
| GCA_01839 | 94.86       | 0    | d_Bacteria; p_Chloroflexota; c_Anaerolineae;                   |
| GCA_00014 | 100         | 0    | o_Aggregatilineales; f_Phototrophicaceae; g_OLB13;             |
| 5985.1    |             |      | s_OLB13 sp001567485                                            |
|           |             |      | d_Bacteria; p_Chloroflexota; c_Chloroflexia;                   |
|           |             |      | o_Chloroflexales; f_Herpetosiphonaceae; g_JKG1; s_JKG1         |
|           |             |      | sp000526415                                                    |
|           |             |      | d_Bacteria; p_Pseudomonadota; c_Gammaproteobacteria;           |
|           |             |      | o_Burkholderiales; f_Neisseriaceae; g_Neisseria; s_Neisseria   |
|           |             |      | lactamica A                                                    |
|           |             |      | d_Bacteria; p_Pseudomonadota; c_Gammaproteobacteria;           |
|           |             |      | o_Enterobacterales; f_Enterobacteriaceae; g_Lelliottia;        |
|           |             |      | s_Lelliottia sp000016325                                       |
|           |             |      | d_Bacteria; p_Bacteroidota; c_Bacteroidia; o_Cytophagales;     |
|           |             |      | f_Spirosomaceae; g_Emticicia; s_Emticicia oligotrophica        |
|           |             |      | d_Bacteria; p_Bacteroidota; c_Bacteroidia; o_Bacteroidales;    |
|           |             |      | f_Rikenellaceae; g_Alistipes; s_Alistipes avistercoris         |
|           |             |      | d_Archaea; p_Thermoproteota; c_Bathyarchaea; o_TCS64;          |
|           |             |      | f_TCS64; g_JAGTRB01; s_JAGTRB01 sp018396865                    |
|           |             |      | d_Archaea; p_Thermoproteota; c_Thermoprotei A;                 |
|           |             |      | o_Sulfolobales; f_Ignisphaeraceae; g_Ignisphaera;              |
|           |             |      | s_Ignisphaera aggregans                                        |

**Table S2.** Quality score and GTDB taxonomy of reference MAGs.

| Genome          | Completeness | Contamination | Taxonomy                                     |
|-----------------|--------------|---------------|----------------------------------------------|
| GCA_001593855.1 | 74.3         | 1.32          | d_Archaea; p_Thermoproteota; c_Bathyarchaea; |
| GCA_002255025.1 | 73.83        | 0.93          | o_B25; f_B25; g_B25; s_B25 sp001593855       |
| GCA_003661975.1 | 83.64        | 6.07          | d_Archaea; p_Thermoproteota; c_Bathyarchaea; |
| GCA_001273345.1 | 50.34        | 9.22          | o_ex4484-135; f_ex4484-135; g_ex4484-135;    |
| GCA_002726865.1 | 92.99        | 3.31          | s_ex4484-135 sp002255025                     |
|                 |              |               | d_Archaea; p_Thermoproteota; c_Bathyarchaea; |
|                 |              |               | o_B26-1; f_B26-1; g_B63; s_B63 sp003661975   |
|                 |              |               | d_Archaea; p_Bathyarchaeota; s_SG8-32-1      |
|                 |              |               | d_Archaea; p_Thermoproteota; c_Bathyarchaea; |
|                 |              |               | o_TCS64; f_TCS64; g_GCA-2726865; s_GCA-      |

(Continued)

|                 |       |      |                                                                                                                                                 |
|-----------------|-------|------|-------------------------------------------------------------------------------------------------------------------------------------------------|
| GCA_002010925.1 | 77.28 | 1.25 | d__Archaea; p__Thermoproteota; c__Bathyarchaea;<br>o__B26-1; f__UBA233; g__UBA233; s__UBA233<br>sp002010925                                     |
| GCA_004376295.1 | 97.82 | 1.87 | d__Archaea; p__Thermoproteota; c__Bathyarchaea;<br>o__B26-1; f__BA1; g__SOJZ01; s__SOJZ01<br>sp004376295                                        |
| GCA_001768965.1 | 72.26 | 1.94 | d__Archaea; p__Thermoproteota; c__Bathyarchaea;<br>o__40CM-2-53-6; f__FEN-987; g__FEN-987; s__FEN-<br>987 sp001768965                           |
| GCA_003978185.1 | 60.21 | 0.7  | d__Bacteria; p__Pseudomonadota;<br>c__Gammaproteobacteria; o__PS1; f__Thioglobaceae;<br>g__Thioglobus_C; s__Thioglobus_C sp003978185            |
| GCA_012964205.1 | 90.02 | 4.25 | d__Bacteria; p__Pseudomonadota;<br>c__Gammaproteobacteria; o__PS1; f__Thioglobaceae;<br>g__Thioglobus_A; s__Thioglobus_A sp012963715            |
| GCA_008080915.1 | 82.42 | 0    | d__Bacteria; p__Pseudomonadota;<br>c__Gammaproteobacteria; o__PS1; f__Thioglobaceae;<br>g__VMDI01; s__VMDI01 sp008080915                        |
| GCA_001628345.1 | 86.6  | 3.53 | d__Bacteria; p__Pseudomonadota;<br>c__Gammaproteobacteria; o__PS1; f__Thioglobaceae;<br>g__Pseudothioglobus; s__Pseudothioglobus<br>sp001628405 |
| GCA_014384345.1 | 97.35 | 0    | d__Bacteria; p__Pseudomonadota;<br>c__Gammaproteobacteria; o__PS1; f__Thioglobaceae;<br>g__Thioglobus_A; s__Thioglobus_A pontius                |
| GCA_018645225.1 | 95.81 | 0    | d__Bacteria; p__Pseudomonadota;<br>c__Gammaproteobacteria; o__PS1; f__Thioglobaceae;<br>g__SUP05; s__SUP05 sp000205985                          |
| GCA_018697175.1 | 78.57 | 5.68 | d__Bacteria; p__Pseudomonadota;<br>c__Gammaproteobacteria; o__PS1; f__Thioglobaceae;<br>g__SUP05; s__SUP05 sp000205985                          |
